# Supplementary material
Source: PubMed Central journal article supplement (PMC2739828)
Supplement: 90728.2008_2.pdf [file 90728.2008_2.pdf]

SUPPLEMENTAL TABLE 1

*Oligonucleotide probes generated for analysis of mouse Atp8b1, Fatp5, and BAT1 mRNA expression by QuantiGene branched DNA signal amplification assay*

| Name      | Accession number | Target Region                | Function | Sequence                                          |
|-----------|------------------|------------------------------|----------|---------------------------------------------------|
| ATP8B1    | NM_001001488     | 2507-2523                    | CE       | ccgtctccggctctggcTTTTTctcttgaaagaaagt             |
|           |                  | 2586-2602                    | CE       | cgcggcagcagatgacgTTTTTctcttgaaagaaagt             |
|           |                  | 2603-2620                    | CE       | ccttctgctggcgctgaTTTTTctcttgaaagaaagt             |
|           |                  | 2664-2681                    | CE       | ccgtctccgatggccaggTTTTTctcttgaaagaaagt            |
|           |                  | 2490-2506                    | LE       | tccgatccgcctctccTTTTTtaggcataggaccctgtct          |
|           |                  | 2569-2585                    | LE       | gcgctgcactcgaggcTTTTTtaggcataggaccctgtct          |
|           |                  | 2621-2639                    | LE       | accaggtccaccacatggTTTTTtaggcataggaccctgtct        |
|           |                  | 2682-2703                    | LE       | gatcatgtgacatcattggccTTTTTtaggcataggaccctgtct     |
|           |                  | 2704-2724                    | LE       | aacaccaatgtgggcagtttTTTTTtaggcataggaccctgtct      |
|           |                  | 2797-2814                    | LE       | gaccagcagcaaccgctgTTTTTtaggcataggaccctgtct        |
|           |                  | 2815-2833                    | LE       | tgaagaccaccggcctgtTTTTTtaggcataggaccctgtct        |
|           |                  | 2911-2931                    | LE       | ctgggctgagtagccattgaaTTTTTtaggcataggaccctgtct     |
|           |                  | 2468-2489                    | BL       | tctctgtccttgggaactca                              |
|           |                  | 2524-2546                    | BL       | cgctgtcttttctcttccag                              |
|           |                  | 2547-2568                    | BL       | caggccacgaagtcttttgc                              |
|           |                  | 2640-2663                    | BL       | gtgatggcttctgtacctctc                             |
|           |                  | 2725-2747                    | BL       | atcccttctgtccactattcc                             |
|           |                  | 2748-2769                    | BL       | gtcactggacatgacagcttgc                            |
|           |                  | 2770-2796                    | BL       | cagatatctgaactgagcaaaagaata                       |
|           |                  | 2834-2856                    | BL       | tcgtaggaactgcacatcctta                            |
| 2857-2882 | BL               | aaggcaaagtcttgtaaaagaagta    |          |                                                   |
| 2883-2910 | BL               | gaaggagtaccagaaatgaactaaagta |          |                                                   |
| Fatp5     | NM_009512        | 496-517                      | CE       | tgtgattgaggagccctcagacTTTTTctcttgaaagaaagt        |
|           |                  | 558-578                      | CE       | ccttcagcttgccttcaggaTTTTTctcttgaaagaaagt          |
|           |                  | 785-805                      | CE       | gggaaggactcttccagggtTTTTTctcttgaaagaaagt          |
|           |                  | 475-495                      | LE       | ccagtacacaccaaggccaccTTTTTtaggcataggaccctgtct     |
|           |                  | 518-537                      | LE       | ctggcatccagctggctattTTTTTtaggcataggaccctgtct      |
|           |                  | 538-557                      | LE       | cccatgctgcctgacaggacTTTTTtaggcataggaccctgtct      |
|           |                  | 601-625                      | LE       | gagaactaagatagcagcagcatctTTTTTtaggcataggaccctgtct |
|           |                  | 685-703                      | LE       | tggattgatccaggccacaTTTTTtaggcataggaccctgtct       |
|           |                  | 704-721                      | LE       | gggatccctcggctgtgTTTTTtaggcataggaccctgtct         |
|           |                  | 745-763                      | LE       | aatcagcactggccccaTTTTTtaggcataggaccctgtct         |
|           |                  | 806-828                      | LE       | tgaatgttctcagctagcagctTTTTTtaggcataggaccctgtct    |
|           |                  | 579-600                      | BL       | cttgtgtctggattacggcat                             |
|           |                  | 626-645                      | BL       | gcagaaatggctctggacgg                              |
|           |                  | 646-667                      | BL       | caaccccagaaacacactcaaa                            |
|           |                  | 668-684                      | BL       | gggcagcccaacttggc                                 |
|           |                  | 722-744                      | BL       | gagctccgtacagagttagcaa                            |
| 764-784   | BL               | ctcctggaggctctggatccac       |          |                                                   |

TABLE1  
Continued

| Name | Accession number | Target Region | Function | Sequence                                           |
|------|------------------|---------------|----------|----------------------------------------------------|
| BAT  | NM_007519        | 607-626       | CE       | ggatcctcttgaccccaggTTTTTctcttgaaagaaagt            |
|      |                  | 729-748       | CE       | cagaagactggcccgaactTTTTTctcttgaaagaaagt            |
|      |                  | 906-927       | CE       | ccaatctctgctcaatgcataTTTTTctcttgaaagaaagt          |
|      |                  | 584-606       | LE       | gccacataccaccttccagagtTTTTTaggcataggaccctgtct      |
|      |                  | 627-646       | LE       | gatgcggttcccttacctTTTTTaggcataggaccctgtct          |
|      |                  | 686-707       | LE       | caaacaagtcaatgaccctggTTTTTaggcataggaccctgtct       |
|      |                  | 708-728       | LE       | ccatcaatccaccagcacctcTTTTTaggcataggaccctgtct       |
|      |                  | 767-789       | LE       | ttccagtaagccagagctaaggtTTTTTaggcataggaccctgtct     |
|      |                  | 812-839       | LE       | caaaatattctagatctacctctccagTTTTTaggcataggaccctgtct |
|      |                  | 866-884       | LE       | ggccgaggaccttaggatgTTTTTaggcataggaccctgtct         |
|      |                  | 647-664       | BL       | cagaaacagggtccccg                                  |
|      |                  | 665-685       | BL       | aaaaggaccttctctggagg                               |
|      |                  | 749-766       | BL       | ggcaaagccacgacttc                                  |
|      |                  | 790-811       | BL       | tcgagaaggcaggtcatcatag                             |
|      |                  | 840-865       | BL       | tctcaggagaaactctcaccttct                           |
|      |                  | 885-905       | BL       | cagaaaggatgccaacacctg                              |
|      |                  | 928-954       | BL       | tgttttaggttaatagccatagaaagt                        |
